# Supplementary material
Source: PubMed Central journal article supplement (PMC4558662)
Supplement: supp_tpc.114.134858_tpc134858_Supplemental.pdf [file supp_tpc.114.134858_tpc134858_Supplemental.pdf]

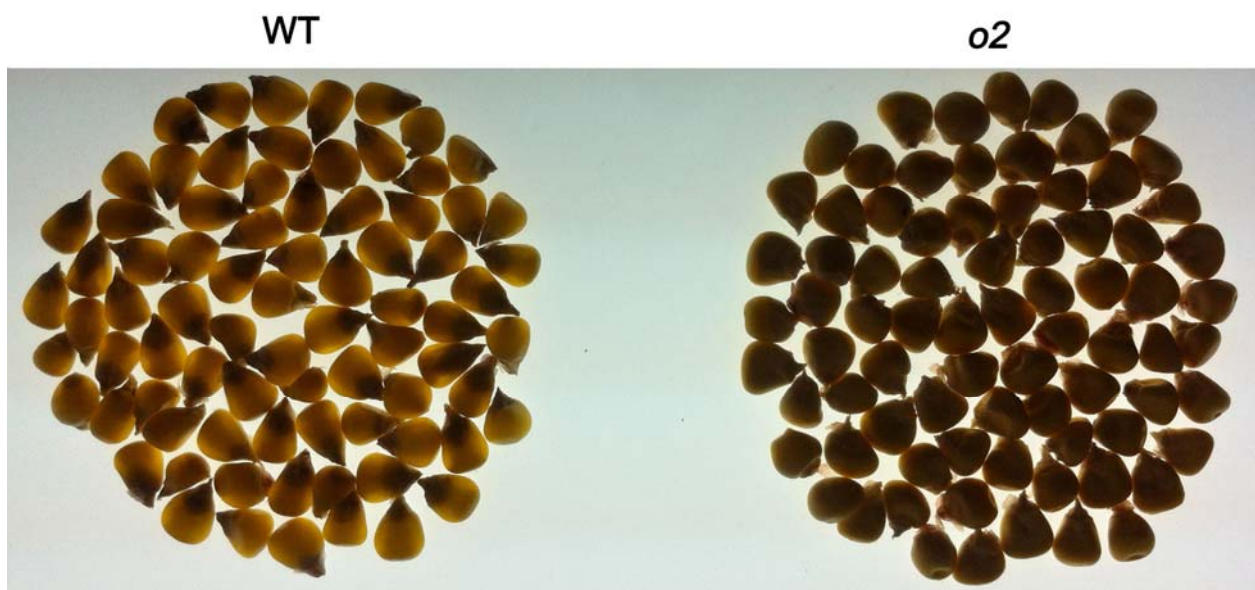

**Supplemental Figure 1.** Phenotype of mature wild type and *o2* kernels. The mature homozygous mutant kernels (*o2/o2*) and homozygous wild-type kernels (wild type/wild type) were randomly selected and viewed on a light box.

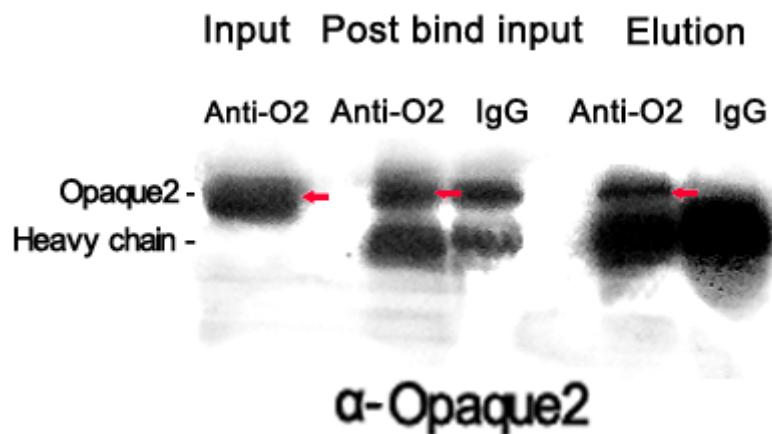

**Supplemental Figure 2.** Determination of the O2 antibody specificity in input sample, post bind input sample and elution sample of the ChIP experiment by immunoblot analyses. Arrows indicate O2-specific band.

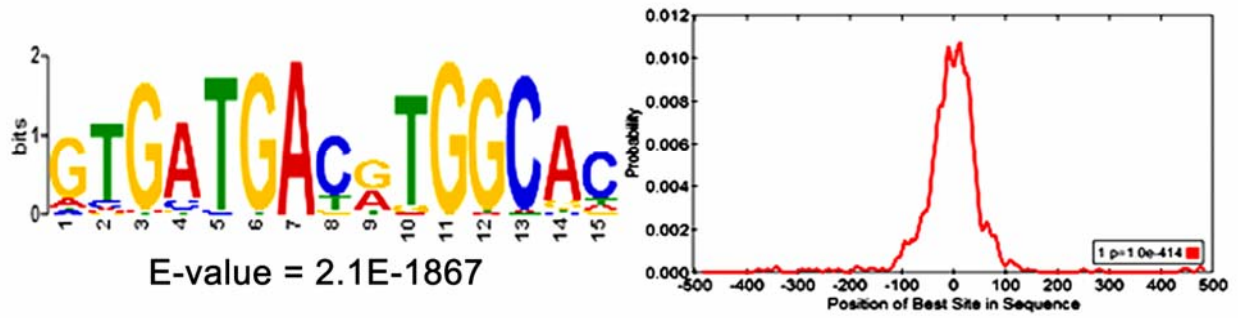

**Supplemental Figure 3.** O<sub>2</sub> binding motif identified by MEME-ChIP on 1kb flanking sequences around the intergenic peak summits and its density plot around the summits of peaks.

**Supplemental Table 1.** mRNA accumulation differences identified by RNA-Seq and qRT-PCR for 38 out of the 40 selected DEGs.

| Gene             | RNA-Seq WT/o <sub>2</sub> (log <sub>2</sub> ) | P-value   | qPCR WT/o <sub>2</sub> (log <sub>2</sub> ) | P-value |
|------------------|-----------------------------------------------|-----------|--------------------------------------------|---------|
| GRMZM2G331701    | -4.12                                         | 1.45E-04  | -5.10                                      | 0.046   |
| GRMZM2G061758    | -5.67                                         | 2.15E-02  | -2.29                                      | 0.0054  |
| GRMZM2G026703    | -5.14                                         | 9.90E-25  | -4.65                                      | 0.011   |
| GRMZM2G380656    | -2.93                                         | 3.37E-303 | -2.63                                      | 0.00069 |
| GRMZM2G030717    | -2.36                                         | 1.45E-13  | -2.47                                      | 0.048   |
| GRMZM2G112247    | -1.70                                         | 2.44E-05  | -1.85                                      | 0.016   |
| GRMZM2G063536    | 4.52                                          | 3.15E-49  | 4.90                                       | 0.027   |
| GRMZM2G066413    | 3.53                                          | 6.33E-03  | 4.07                                       | 0.035   |
| AC208337.2_FG003 | -18.56                                        | 3.75E-02  | -1.83                                      | 0.037   |
| GRMZM2G015534    | 7.63                                          | 8.59E-75  | 7.17                                       | 0.0088  |
| GRMZM2G126083    | 2.81                                          | 3.10E-04  | 5.86                                       | 0.035   |
| GRMZM2G181362    | 2.19                                          | 2.48E-17  | 1.83                                       | 0.069   |
| GRMZM2G091201    | 2.76                                          | 2.42E-06  | 2.81                                       | 0.019   |
| GRMZM2G170201    | 1.05                                          | 7.05E-08  | 1.26                                       | 0.0013  |
| GRMZM2G015364    | 4.06                                          | 9.77E-04  | 1.95                                       | 0.026   |
| GRMZM2G429533    | 3.26                                          | 4.02E-04  | 4.83                                       | 0.0022  |
| GRMZM2G326116    | 2.26                                          | 5.44E-07  | 3.80                                       | 0.0024  |
| GRMZM2G037411    | -2.24                                         | 2.53E-05  | -2.31                                      | 0.019   |
| GRMZM2G038536    | 1.31                                          | 4.53E-03  | 1.26                                       | 0.040   |
| GRMZM2G146490    | -2.34                                         | 1.63E-06  | -1.99                                      | 0.022   |
| GRMZM2G540772    | 5.87                                          | 3.42E-03  | 1.57                                       | 0.042   |
| GRMZM2G008607    | 2.03                                          | 1.07E-06  | 1.33                                       | 0.0094  |
| GRMZM2G108523    | 1.43                                          | 8.59E-04  | 1.54                                       | 0.034   |
| GRMZM2G117840    | 1.62                                          | 1.23E-35  | 1.26                                       | 0.013   |
| GRMZM2G121029    | 1.39                                          | 6.15E-04  | 1.85                                       | 0.0035  |

|               |       |          |       |        |
|---------------|-------|----------|-------|--------|
| GRMZM2G126083 | 2.81  | 3.10E-04 | 5.86  | 0.035  |
| GRMZM2G128832 | 1.19  | 1.15E-07 | 2.29  | 0.0085 |
| GRMZM2G129674 | 2.28  | 9.09E-04 | 2.96  | 0.0011 |
| GRMZM2G131205 | 1.55  | 2.03E-04 | 1.44  | 0.018  |
| GRMZM2G131888 | 4.03  | 5.62E-06 | 4.77  | 0.0091 |
| GRMZM2G143008 | 1.49  | 1.20E-14 | 1.73  | 0.0018 |
| GRMZM2G002173 | -3.96 | 4.02E-04 | -4.18 | 0.048  |
| GRMZM2G029521 | -1.94 | 7.53E-04 | -2.92 | 0.012  |
| GRMZM2G039588 | -1.15 | 6.18E-07 | -1.04 | 0.013  |
| GRMZM2G103900 | -2.58 | 6.71E-28 | -3.76 | 0.073  |
| GRMZM2G129399 | -3.48 | 4.21E-09 | -3.62 | 0.042  |
| GRMZM2G134054 | -2.31 | 3.02E-09 | -2.28 | 0.011  |
| GRMZM2G304548 | -1.25 | 0.00E+00 | -1.25 | 0.049  |
| GRMZM5G836174 | -3.59 | 4.65E-06 | -3.72 | 0.025  |
| GRMZM2G149647 | -4.01 | 1.10E-11 | -4.09 | 0.016  |

**Supplemental Table 2.** Probes for EMSA as specific sequences derived from potential O2 direct targets containing O2 binding sites.

| <i>cis</i> -element | Probe sequence                                            |
|---------------------|-----------------------------------------------------------|
| Z1                  | AAAGCACGTTTGCTAGAGAGATCTCACATGTGTTACACAGTACATAGATCTCGCGG  |
| Z2                  | GCTATTAGGGACAGGGCCATACAACATGCATGATAACTTATTGAGTTTGGGTA     |
| Z3                  | CATGTCATCCACGTAGATGAAAAAATTCCTATATAAAAATGACACCTTTTCTTGT   |
| B1                  | TAAATGTCAAACCAACTAGATACCATGTCATCTCTACCTTATCTTACTAATGTT    |
| B2                  | GTAGAGTAGTAACAACCATCTTCCATATCATCAGTACTGACAGGTGAAGTCAATA   |
| B3                  | TAAATGTCAAAGCCAACACTAGATACCACATCATCTCTAGCTTATCTTACTAATATC |
| B4                  | CATTAAGAGGTTGGATGTTAGTGGGATGACATGACTATTAGTAGGACGAGATGA    |
| B5                  | CCCCTCCTGTCTATAAAAAAAGTTGACGTGAATAGATTTTATTAAAGAGGTTGGA   |
| B5-like-box         | CAGAAAGTGCAATACAATACATGTTGACGTTGGTAAGGCATGGTGTCTAGCACAC   |
| O2-like-box         | TGTCAAGCTAAATCTAATTCGTTTACGTAGATCAACAACCTGTAGAAGGCAACAA   |
| O2 BS-1             | CGTAGGGAAGCAAGCCCCTACGTGTTGATCTGAGGTGGCCGCGGGCGTCCGGATAT  |
| O2 BS-2             | CTTGTCATGTAGCCGTAGATGATGATGACGTGTGTTTTTTTTTGGCGGGAGAGGTC  |
| C-box               | GTGCCTACAATGAAGTGAAAGGTGATGAGTCATGGTGTGTGTAAGAGGCATTAC    |
| TGACGTGG            | TGGTTTTGGAATGTTGCGTTGCATGACGTGGAAACATAGTACATGGATTTGGATTT  |
| TGGCGTGGCA          | TTTGGCGTGTAGAAGCTGGACTGTGGCGTGGCAACCGGATAAGCGCACGCGTGGCCG |
| TGACATGTAA          | AGCAAGAAAAGGACAATAACTTGACATGTAAAGTGAAGCTTATTATACTTCCTA    |
| TGTCGTGTCA          | GCCGCTTCTGTGTGTGACTCACGCTGTCGTGTCAAGCCGCACGCATGCGTGACGCGC |

**Supplemental Table 3.** Primers used in these experiments.

|                  | <b>Primer name</b>       | <b>Sequence</b>          |
|------------------|--------------------------|--------------------------|
| Real-time<br>PCR | AC208337.2_FG003         | AGCCAAGGGCATAAGAGATGGTG  |
|                  |                          | ACCACGTGTCATCCAGCCATTTG  |
|                  | GRMZM2G331701            | ATCGCGAAGACACACTGGGTAG   |
|                  |                          | AGAAACTCCACCCGATCAAAGCTG |
|                  | GRMZM2G061758            | AGGCCAAAGGGTTTCTCTTCGTG  |
|                  |                          | TCTGACGGTGACGGAAATCGAG   |
|                  | GRMZM2G026703            | GACAAGAAGCCGACCCATTCCAAC |
|                  |                          | TCATAGAACCGCGGGCGATGTTTG |
|                  | GRMZM2G380656            | TTGCTCCTCCTGACCTTTGCTG   |
|                  |                          | TCCCTTTCTGTTCTGGCTTCG    |
|                  | GRMZM2G030717            | ACCGCCGGTGTAGTGTAGTATC   |
|                  |                          | AGCGCAGAGTTCGTCCATCTTC   |
|                  | GRMZM2G112247            | TCCTCTTCAGCTCAGGGTTGTATG |
|                  |                          | TGTGGGCCCAAACGTACTIONAAG |
|                  | GRMZM2G063536            | AACTGCACCGACCATAAAGGG    |
|                  |                          | TAGAACCATAGCTCCGGGACCTTC |
|                  | GRMZM2G066413            | GCTTCCATGGCTATCAGAAGCTC  |
|                  |                          | AGGAGACGATCACAACCACACG   |
|                  | GRMZM2G015534            | TCAAACAATCACACTGGAGGTAGC |
|                  |                          | CCGTTTATCAGCTTGTCTGCAC   |
|                  | GRMZM2G126083            | AGGTGCTACGTGCCAAACTTCG   |
|                  |                          | TCCCTCTGTTCTGTGGTTTCTCG  |
|                  | GRMZM2G181362            | CCTATGGCCACAATGAGCAAGAC  |
|                  |                          | AACCTTCCCGAACTCCAGTAGC   |
|                  | GRMZM2G091201            | ACAAAGCTAGCACCGAGATCCAG  |
|                  |                          | TGATCCCGTCTCGCAAAGGTAAAG |
|                  | GRMZM2G170201            | CAACGCAGACAGTCCAAGATGG   |
|                  |                          | CACAACCGCACTACGAATGCTC   |
|                  | GRMZM2G015364            | AAGTACAGCCAGAAGCGTCGTC   |
|                  |                          | TCTCTTGCTCCTGATCGTAGTCG  |
| GRMZM2G429533    | TAAGCTGCTCAATGCCACACAGC  |                          |
|                  | CGCCATTATATATCGCTGCGAGTC |                          |
| GRMZM2G326116    | ATGGAGACGGCAATGTCAAAGC   |                          |
|                  | TGCGCGAGGATCATCAACAGAC   |                          |
| GRMZM2G037411    | CAGCCACATCACCTTCGAGAAC   |                          |
|                  | ACCTGTACAGCATGGTCTTGTCG  |                          |
| GRMZM2G038536    | GCCAGCAGCAAATGGTTCACTC   |                          |
|                  | ACTGTCTCGAAACCTGATGCTACG |                          |
| GRMZM2G146490    | GGCCATGGATGATTTGGCACAG   |                          |
|                  | TCAGTTCACTTGGCTCTGGCTTC  |                          |
| GRMZM2G540772    | ACGAGGAGCAGATCCTGTGCTATC |                          |

|           |                          |                                                      |
|-----------|--------------------------|------------------------------------------------------|
|           |                          | TCTTCTGCCGTGCGCTTATGTG                               |
|           | GRMZM2G18076             | AAGGCGGAGAGCCTAGAAGATG<br>TGAAGCACCATTGCCATACTTG     |
|           | GRMZM2G108523            | GTCGTTTATGCAGCAGCGATCC<br>ACGTTCTCACGCTCACAGAAAGG    |
|           | GRMZM2G117840            | TGCCTACATGCTTTGGTTGGTG<br>AGAGTCGGGTTTCCCGTTTACC     |
|           | GRMZM2G121029            | ACAACATCCATGGGACCAACCG<br>TTGACCGGAGAGGAGTTGGATCAG   |
|           | GRMZM2G126083            | AGGTGCTACGTGCCAAACTTCG<br>TCCCTCTGTTCTGTGGTTTCTCG    |
|           | GRMZM2G128832            | TCTGCATTTGCAGCCAGTCGTC<br>TGGATCGTCTGCATAGTCCGATTG   |
|           | GRMZM2G129674            | ATGCCGACGGAGATGCAGATATGG<br>ATCATCAGCTCAGGCACGATCCTC |
|           | GRMZM2G131205            | TGCTGCTCGAGAAGGGATACAC<br>GTTCTTCGGGTCATCTGGGTTC     |
|           | GRMZM2G131888            | ACATCCTCTGCCTGTGATTTTCGTG<br>ATAGTAGATCCTCCGCCGAAGC  |
|           | GRMZM2G143008            | TTTCGTGACGATCGCCAAAGGG<br>TCTTTATCGCTGCGCGGACTTC     |
|           | GRMZM2G002173            | GCCTTCTGCGTATCCTTCAAGC<br>TTGGCCACAACAACGTCCATCC     |
|           | GRMZM2G029521            | GCCCATCTCCTCCTCTCTCAATTC<br>AACGGTTGGAGAATCGCACCAC   |
|           | GRMZM2G039588            | CCAATATGCTTTCCGCAGTTCTCC<br>CCTTGCAAATCCATGTGGTTCCAG |
|           | GRMZM2G103900            | AGCAGCTTAGTTCATGTTCTGTC<br>TCCATACGATGTGAAACCTTCTGC  |
|           | GRMZM2G129399            | AAGATCGAGGCGCAGTATGTGG<br>ATCTTCTTCTCGCAGCCGTAGG     |
|           | GRMZM2G134054            | GCATCCACTTCGTCATGCTTGC<br>TTGTACTIONGCGCACCTGATCTGC  |
|           | GRMZM2G304548            | TCTCGGATCGTTCATCCGGAAC<br>TCTCATGCACGTTGGGAGATCAG    |
|           | GRMZM5G836174            | CCATCGATCCAGTGCAAACAAGC<br>TGCTTCGTGTGGTAGACCGTAG    |
|           | GRMZM2G149647            | GGACAACAGTGTCGACGTACAG<br>ACATCGGATCAACTAACCCGAACG   |
| ChIP qPCR | 19 kD $\alpha$ -zein z1A | GGACAATAACGAGAGGAAAAACCA<br>ATCAGTCCTTGTGCTTGTGC     |
|           | 19 kD $\alpha$ -zein z1B | GGTCACTAAATGTCAAAGCCAACT<br>ACACATGTTAGACCTTGTGCTT   |

|                     |                                       |                                    |
|---------------------|---------------------------------------|------------------------------------|
|                     | 19 kD $\alpha$ -zein z1D              | TGTGTCATACCACTTGCCCT               |
|                     |                                       | ACAAGTGCAACCCTTAGCCA               |
|                     | 22 kD $\alpha$ -zein                  | AGATCATGCATGTCATTCCACG             |
|                     |                                       | TCCACTACCTACAAGAAAAGGTGT           |
|                     | 14 kD $\beta$ -zein                   | GTGGATCCAAGGCATCCTAACA             |
|                     |                                       | CGCTTGTGAAGCTAACTTTGT              |
|                     | 27 kD $\gamma$ -zein                  | AGGCCGGACAGGACAAAAAT               |
|                     |                                       | GTACTTCTGCGTGGCTCAGT               |
|                     | 50 kD $\gamma$ -zein                  | TTCATACAAAGCAAGAAAAGGACA           |
|                     |                                       | GTGGATTTTTGGACCTTTGTGC             |
|                     | 10 kD $\delta$ -zein                  | ACAAGTCCAAGTATTAAGTATCCGA          |
|                     |                                       | AGCATGACAAATATCGGAACGG             |
| cyPPDK1             | TTCGAAGGCATTTTCCGTGC                  |                                    |
|                     | GGGAGTCCTGAAACGCAAGA                  |                                    |
| ZmUBQ               | GACGAGTCTAACGGACACCA                  |                                    |
|                     | ATTTCTGGATGCCGACAGCG                  |                                    |
| b-32                | AGGACGAGATGATGTGGAAAGT                |                                    |
|                     | GCATGCAGCCATGTTGGTAG                  |                                    |
| Vector construction | LGL<br>GRMZM2G312877                  | CGGTCGACTATGTCCGAATCCATATATAGGCTT  |
|                     |                                       | CCCAAGCTTCTCCTGCAGCGCTGTTAATTCCGA  |
|                     | LGL<br>GRMZM2G028110                  | GCGTCGACGTCCCTAAAATATTAATGATAATA   |
|                     |                                       | ATCCCGGGCCTCCTCGATGATCTTCTGTGTAGC  |
|                     | p19 kD z1A                            | GCAAGCTTACTTCTAAGAATTTGGTATGCCAGT  |
|                     |                                       | GCGCGGCCGCTCACTCGATCCCCACCGATA     |
|                     | p19 kD z1B                            | GCAAGCTTTTCTAGGGTACCAGGCCTCC       |
|                     |                                       | GCGCGGCCGCTGCAGAAAGAGCAAGGAGCA     |
|                     | p19 kD z1D                            | GCAAGCTTATCAACTCTTGTTTCATCATT      |
|                     |                                       | GCGCGGCCGCTGGTGCTAAGATGTTGCTAG     |
|                     | p 22 kD                               | GCAAGCTTTCCGGTATGCACTGAAAGCA       |
|                     |                                       | GCGCGGCCGCTCAAAATATTATGGGTGATGGTT  |
|                     | p 14 kD                               | GCAAGCTTTGCTGCCCTGCTGGAATAAA       |
|                     |                                       | GCGCGGCCGCTAACGCTTAGACCACTGGAAGC   |
|                     | p 27 kD                               | GCCTCGAGTCTCTGTGTGCAAAGAAACA       |
|                     |                                       | GCGCGGCCGCGGGTTCTTCTGCGCTCTGG      |
|                     | p 50 kD                               | GCGTCGACTTGAGAGCAATGGTATGCAAATCCT  |
|                     |                                       | CGGGATCCGGTTTTTGGAGTTAGATAATTGATG  |
|                     | p 10 kD                               | GCGTCGACCCGTATAAGAGGGCTAAGATCTAAT  |
|                     |                                       | CGGGATCCGGCGGTGGTGTCCCTTGCTTCCTAGA |
| p MYB               | CCCAAGCTTAACCAGTGGGGCAACCACAAGTCAAACC |                                    |
|                     | CGGGATCCTGCTGCGCGGTTCCCTGACGGTGACGG   |                                    |
| p GBF1              | GCGTCGACCTCGCGGTCTCTCTCCTTCCCTGATT    |                                    |
|                     | CGGGATCCGACAGTATCTGCTAGTCTGTCATGTAAA  |                                    |
| p NFYB              | CCCAAGCTTCTTTCACTATGTGTCAAGTCACCTCTCA |                                    |

|  |           |                                                                         |
|--|-----------|-------------------------------------------------------------------------|
|  |           | CGGGATCCCGCGGCGGAGCCACCGAACAGCACTGTC                                    |
|  | p cyPPDK1 | CCCAAGCTTTATGCATCACGCATGGAACAAGAGG<br>CGGGATCCTAGCACAGGGAAACAGCGCTAGCTA |
|  | p cyPPDK2 | GCGTCGACACTGATACGATCGACGAATAAAAAA<br>CGGGATCCTAGCACGGCAAAGCAAAGCAAACAA  |
|  | Opaque-2  | GCCCCGGGATGGAGCACGTCATCTCAAT<br>GCGAATTCCTAATACATGTCCATGTGTA            |
